# Supplementary material for: Supercritical fluid mixing: preparation of thermally sensitive polymer composites containing bioactive materials
Source: Royal Society of Chemistry journal article supplement (doi:10.1039/b008188o), 2001-01-01
Supplement: b008188o.doc [file b008188o.doc]

# Methods

Scanning electron micrographs of the foams were recorded on a Philips XL30 instrument. The porous structure was further characterised by mercury porosimetry (Quantachrome Poremaster 60). The authors gratefully acknowledge the assistance and co-operation of the Quantachrome Corporation.

**Measurement of Ribonuclease A activity**

Ribonuclease A activity was determined by measuring the maximum rate of cytidine 3’-phosphate production (absorbance at 284 nm) following the addition of cytidine 2’:3’- cyclic monophosphate to the enzyme at 37C. (*see for example* E. M. Crook, A. P. Mathias and B. R. Rabin, *Biochemical Journal* **1960**, *74*, 234-238) After release in Tris.HCl, pH 7.13 (Sigma) for 5 minutes at 37C, was carried out spectrophotometrically in a Beckman 640 Spectrophotometer. 10 l aliquots of the samples were added to 2.5 ml of 0.1 mg/ml cytidine 2`:3`-monophosphate (Sigma) in a quartz-stoppered cuvette pre-heated to 37C, on the end of a spatula. The solutions were mixed for 10 seconds and readings were started 20 seconds after the initial addition of the sample. The volume of sample added to the reaction mixture was negligible. Readings were taken at 284nm every 2 seconds (averaged over 1 second) for 60 seconds thereafter. The initial rate of hydrolysis of cytidine 2`:3`-monophosphate to cytidine 3`-phosphate was calculated from the rate of change in absorbance over the first 30 seconds. To determine total protein, Coomassie method was used with supercritically treated ribonuclease A as standard. 300 l of Coomassie G-250 Dye (Pierce) was added to 10 l aliquots of samples in a 96-well plate (Costar). After 30 seconds shaking, blue protein complexes were measured at 620 nm in a plate reader (Labsystems) and analysed by Genesis software. The measured sample rates were plotted on a standard curve and the recovery of activity was expressed as a percentage of total protein
